# Supplementary material
Source: ML conference proceedings conference paper supplement (https://openaccess.thecvf.com/content/CVPR2023/html/Fei_Masked_Auto-Encoders_Meet_CVPR_2023_paper.html)
Supplement: Supplementary file 1 [file Fei_Masked_Auto-Encoders_Meet_CVPR_2023_supplemental.pdf]

## A. Experimental Details

We follow the implementation details of the official MAE [28] for all pre-training and fine-tuning. Meantime, we follow the implementation of bootMAE [20] for settings of segmentation tasks. While MAE uses only ViT-B and ViT-L, we also use ViT-S [60].

For pre-training, we use the same effective batch size of 4096 as MAE with `accum_iter`, *e.g.*, 256 (`batch_size_per_gpu` × 8 (GPUS) × 2 (`accum_iter`)). The detail configurations is listed in Table 9. For end-to-end fine-tuning, we provide the configures in Table 10 for different backbones.

Table 9. Pre-training settings.

| Config                 | Value            |
|------------------------|------------------|
| optimizer              | AdamW            |
| optimizer momentum     | 0.9, 0.95        |
| weight decay           | 0.05             |
| base learning rate     | 1.4e-4           |
| learning rate schedule | cosine           |
| warmup epochs          | 40               |
| augumentation          | RandomResizeCrop |

Table 10. Fine-tuning settings.

| Config                 | Value                 |
|------------------------|-----------------------|
| optimizer              | AdamW                 |
| optimizer momentum     | 0.9, 0.999            |
| weight decay           | 0.05                  |
| layer-wise lr decay    | 0.75 (S), 0.65 (B, L) |
| base learning rate     | 5e-4                  |
| drop path              | 0.1 (S,B), 0.2(L)     |
| batch size             | 1024                  |
| learning rate schedule | cosine                |
| warmup epochs          | 5                     |
| training epochs        | 300(S), 100 (B,L)     |
| label smoothing        | 0.1                   |

## B. Pytorch Code for Adversarial Training

We also provide the simplified pytorch implementation for adversarial training in GAN-MAE model, to illustrate the optimization process more expressly.

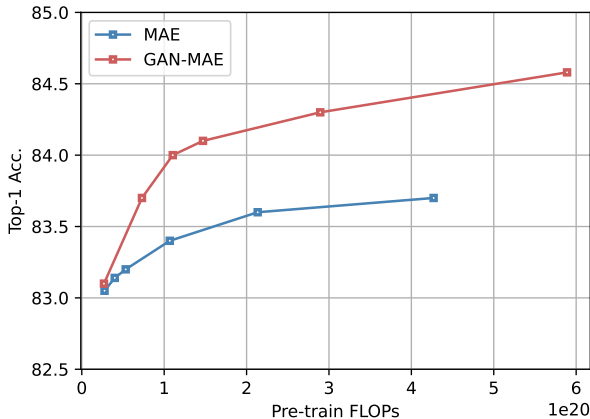

Figure 4. **Performance comparison given the same compute budget with ViT-B structure.** With the advancing of discriminator capacity, the performance gains consistently increase.

Listing 1: Example Pytorch Code

```

1 model = mae_gan_vit_base_patch16()
2
3 optimizer_gen = AdamW(generator_module.
4   parameters(), lr=lr)
5 optimizer_disc = AdamW(discriminator_module.
6   parameters(), lr=lr)
7
8 for raw_img in dataloader_pretrain:
9   # generator training
10  optimizer_gen.zero_grad()
11  gen_loss, corrupt_img, mask = model.
12    forward_with_generator(raw_img)
13  gen_loss.backward()
14  optimizer_gen.step()
15
16 # discriminator training
17 corrupt_img, mask = corrupt_img.detach(),
18   mask.detach()
19 optimizer_disc.zero_grad()
20 disc_loss = model.
21   forward_with_discriminator(
22     corrupt_img, mask)
23 disc_loss.backward()
24 optimizer_disc.step()

```

## C. Extra Experimental Results

**Compute-matched Comparison.** We also chose to measure compute usage in terms of floating point operations (FLOPs) because it is a measure agnostic to the particular hardware, low-level optimizations, etc. We plot the computation-performance curve in Figure 4, and we can observe that GAN-MAE outperforms the MAE persistently under the same computation budget in the downstream classification task.

**Linear Probing Evaluation.** We conduct the linear probing experiment to evaluate the semantic level of a represen-

tation, and the results are listed in Table 11. As can be seen, our method pre-trained on 800 epochs achieves a considerable gain (+4.0%) compared with MAE baselines, even on 1600 epochs.

Table 11. **Linear probing evaluation on ImageNet-1K.** We report the top-1 accuracy for classification with different ViT structures.

| Method  | Pre-train epochs | ViT-B       | ViT-L       |
|---------|------------------|-------------|-------------|
| MAE     | 800              | 64.4        | 73.5        |
| MAE     | 1600             | 67.8        | 75.1        |
| GAN-MAE | 800              | <b>69.3</b> | <b>77.5</b> |
